# Supplementary material
Source: HighWire-hosted journal article supplement (https://bmjopen.bmj.com/content/15/1/e087766)
Supplement: inline-supplementary-material-2 [file inline-supplementary-material-2.pdf]

Appendix 2. Detailed list of all included studies

| Name study                       | Study population                                                                      | Tested intervention    | Comparison 1                                                    | Comparison 2                                     | Publication              | Funding in euros |
|----------------------------------|---------------------------------------------------------------------------------------|------------------------|-----------------------------------------------------------------|--------------------------------------------------|--------------------------|------------------|
| Studies with recruitment failure |                                                                                       |                        |                                                                 |                                                  |                          |                  |
| Obstetrics                       |                                                                                       |                        |                                                                 |                                                  |                          |                  |
| APOSTEL-IV                       | Women with preterm pre-labour rupture of membranes without contractions 24-34 weeks   | Drugs                  | Nifedipine                                                      | Placebo                                          | EJOG Repr Biology 2016   | 0                |
| APOSTEL VIII                     | Women with threatened preterm birth (gestational age 30-34 weeks)                     | Obstetrical treatments | Treatment with atosiban for 48 hours                            | Placebo                                          | Not yet (analyzing data) | 1 400 000        |
| DIGITAT                          | Women with intra-uterine growth restriction beyond 36 weeks gestation                 | Obstetrical treatments | Induction of labour                                             | Expectant management                             | BMJ 2010                 | 400 000          |
| GLUCOMOMS                        | Pregnant women with type 1 or 2 diabetes undergoing insulin therapy <16 or > 30 weeks | Obstetrical treatments | Intermittent use of retrospective continuous glucose monitoring | Standard treatment                               | Diabetes Obes Metab 2018 | 300 000          |
| HighLow                          | Pregnant women with a history of venous thromboembolism                               | Drugs                  | Weigh-adjusted intermediate-dose heparin                        | Fixed low-dose low-molecular-weight heparin      | Lancet 2022              | 1 600 000        |
| HYPITAT-II                       | Women with non-severe hypertensive disorders of pregnancy 34-37 weeks gestation       | Obstetrical treatments | Immediate delivery (induction of labour or caesarean section)   | Expectant management until 37 weeks of gestation | Lancet 2015              | 355 432          |
| INDEX                            | Low risk women with an uncomplicated singleton pregnancy at 41 weeks                  | Obstetrical treatments | Induction of labour                                             | Expectant management until 42 weeks              | BMJ 2019                 | 670 870          |
| IUPC                             | Women in whom induced or augmented labour was required                                | Obstetrical treatments | Internal tocodynamometry                                        | External monitoring                              | NEJM 2010                | 0                |

|               |                                                                                                                                                                      |                        |                                                                                                    |                                                                         |                                                    |            |
|---------------|----------------------------------------------------------------------------------------------------------------------------------------------------------------------|------------------------|----------------------------------------------------------------------------------------------------|-------------------------------------------------------------------------|----------------------------------------------------|------------|
| PPROMEXIL-3   | Women with a singleton pregnancy and preterm pre-labour rupture of the membranes 16-24 weeks gestation with oligohydramnios                                          | Obstetrical treatments | Transabdominal amnion infusion                                                                     | No intervention                                                         | Obstetrics & Gynecology 2019                       | No funding |
| QP singletons | Women with a short cervix < 35mm in a singleton and < 38 mm in a multiple pregnancy                                                                                  | Obstetrical treatments | Cervical pessary                                                                                   | Progesterone                                                            | Submitted                                          | No funding |
| SIMPLE-III    | Term nulliparous women with a singleton pregnancy and a child in cephalic presentation and the Freidman partogram action line is crossed after regular interventions | Obstetrical treatments | Caesarean section                                                                                  | Expectant management waiting until the simple partogram line is crossed | Unpublished                                        | 397 220    |
| STOPORGO      | Pregnant women gestational age < 16 weeks who use SSRIs without clinically relevant depressive symptoms                                                              | Drugs                  | Preventive cognitive therapy with gradual guided discontinuation of SSRIs under medical management | Continue use of SSRIs                                                   | J Clin Psychiatry 2020                             | 500 000    |
| Sugardip      | Women with GDM who do not reach target glycaemic control with modification of diet 16-34 weeks gestation                                                             | Drugs                  | Oral glucose lowering drugs                                                                        | Insulin                                                                 | Submitted                                          | 437 148    |
| TOTEM         | Women with severe preeclampsia 28-34 weeks                                                                                                                           | Obstetrical treatments | Induction of labour                                                                                | Expectant management                                                    | Acta Obstetricia et Gynecologica Scandinavica 2020 | 0          |
| TRIPLE P      | Women with a singleton pregnancy without a history of preterm birth and a cervix length ≤ 30 mm                                                                      | Drugs                  | Progesterone                                                                                       | Placebo                                                                 | Am J Perinatol 2015                                | 1 000 000  |

|                       |                                                                                                                              |                        |                                                                        |                               |                         |           |
|-----------------------|------------------------------------------------------------------------------------------------------------------------------|------------------------|------------------------------------------------------------------------|-------------------------------|-------------------------|-----------|
| WOMB                  | Women with acute anaemia 12-24 hours postpartum without severe anaemic symptoms or comorbidities                             | Obstetrical treatments | Red blood cell transfusion                                             | Expectant management          | BJOG 2014               | 214 450   |
| Reproductive medicine |                                                                                                                              |                        |                                                                        |                               |                         |           |
| AID                   | Women who were eligible for donor sperm treatment with cryopreserved donor semen                                             | Fertility treatments   | Intracervical insemination with cryopreserved donor sperm              | Intrauterine insemination     | Human Reproduction 2021 | 276 000   |
| ALIFE                 | Women with a history of unexplained recurrent pregnancy loss                                                                 | Drugs                  | Aspirin*                                                               | Placebo                       | NEJM 2010               | 112 500   |
| ALIFE2                | Women with recurrent pregnancy loss and inherited thrombophilia                                                              | Drugs                  | Low-molecular-weight heparin + standard treatment                      | Standard treatment            | Lancet 2023             | 1 200 000 |
| COSY                  | Heterosexual couples diagnosed with (relatively) unexplained subfertility and a good prognosis                               | Fertility treatments   | 6 month web-based interactive educational programme of sex counselling | Expectant management          | Submitted               | 300 000   |
| DESH                  | Women aged 18-41 years with uni- or bilateral ultrasound visible hydrosalpinges who were scheduled for an IVF/ICSI treatment | Fertility treatment    | Hysteroscopic proximal occlusion by intratubal device placement        | Laparoscopic salpingectomy    | Human Reproduction 2016 | 0         |
| ESEP                  | Women with a laparoscopically confirmed tubal pregnancy and a healthy contralateral tube                                     | Surgery                | Salpingotomy                                                           | Salpingectomy                 | Lancet 2014             | 63 000    |
| EX-IUI                | Heterosexual couples with unexplained subfertility and a poor                                                                | Fertility treatments   | 6 months IUI with ovarian stimulation                                  | 6 months expectant management | Human Reproduction 2022 | 423 827   |

|          |                                                                                                                           |                       |                                                                                |                                    |                           |         |
|----------|---------------------------------------------------------------------------------------------------------------------------|-----------------------|--------------------------------------------------------------------------------|------------------------------------|---------------------------|---------|
| FOAM     | prognosis for natural conception<br>Infertile women who were scheduled for tubal patency testing during fertility work-up | Diagnostic strategies | Hysterosalpingo-foam sonography                                                | Hysterosalpingography              | Human Reproduction 2022   | 214 340 |
| H2OLIE   | Infertile women who were undergoing hysterosalpingography                                                                 | Diagnostic strategies | Oil-based contrast                                                             | Water-based contrast               | NEJM 2017                 | 0       |
| IVF38    | Subfertile couples diagnosed with unexplained or mild male subfertility in which the women are 38-42 years old            | Fertility treatments  | IVF treatment                                                                  | Expectant management               | Manuscript in preparation | 365 000 |
| M-OVIN   | Women with normogonadotropic anovulation not pregnant after six ovulatory cycles of clomiphene citrate                    | Drugs                 | Six cycles of gondadotrophines***                                              | Six cycles of clomiphene citrate** | Lancet 2019               | 305 000 |
| MASTER 1 | Subfertile couples with male subfertility pre-wash total motile sperm count 3-10 x 10 <sup>6</sup>                        | Fertility treatments  | IUI                                                                            | Expectant management               | Manuscript in preparation | 388 208 |
| MASTER 2 | Subfertile couples with male subfertility pre-was total motile sperm count < 3 x 10 <sup>6</sup>                          | Fertility treatments  | ICSI                                                                           | IVF                                | Manuscript in preparation | 388 208 |
| MEDIUM2  | Subfertile couples undergoing an IVF/ICSI treatment                                                                       | Fertility treatments  | Culture medium G5 to culture all oocytes and resulting embryos of each patient | Culture medium CSCM                | Manuscript in preparation | 0       |
| MISOREST | Women who had primary misoprostol treatment for miscarriage with sonographic evidence of incomplete evacuation of         | Obstetrical treatment | Curettage                                                                      | Expectant management               | Human Reproduction 2016   | 216 000 |

|                  |                                                                                                       |                       |                                                                 |                               |                                 |         |
|------------------|-------------------------------------------------------------------------------------------------------|-----------------------|-----------------------------------------------------------------|-------------------------------|---------------------------------|---------|
| SCRATCH OFO      | the uterus<br>Women with unexplained infertility and a good prognosis for spontaneous conception      | Fertility treatment   | Endometrial scratching in the luteal phase of the natural cycle | Expectant management          | Manuscript in preparation       | 349 732 |
| SOMA             | Premenopausal women with pain and an ovarian endometrioma                                             | Surgery               | Medication                                                      | Surgery                       | Not yet                         | 393 000 |
| STIM             | Women 18-43 years with breast cancer who opted for banking of oocytes or embryos                      | Drugs                 | Ovarian stimulation**** plus tamoxifen                          | Standard ovarian stimulation  | Human Reproduction 2022         | 300 000 |
| T4life           | Women who were TPO-Ab positive 2 or more pregnancy losses and TSH normal range                        | Drugs                 | Levothyroxine                                                   | Placebo                       | Lancet Diabetes Endocrinol 2022 | 205 983 |
| TRUST            | Women with a septate uterus and a wish to conceive                                                    | Surgery               | Uterine septum resection                                        | Expectant management          | Human reproduction 2021         | 322 430 |
| Oncology         |                                                                                                       |                       |                                                                 |                               |                                 |         |
| LAPOVCA          | Patients with suspected advanced-stage ovarian cancer who qualified for primary cytoreductive surgery | Surgery               | Laparoscopy                                                     | Primary cytoreductive surgery | J Clin Oncol 2016               | 322 430 |
| PARIS            | Women undergoing pelvic radiotherapy                                                                  | Diagnostic strategies | Chondroitin sulphate solution                                   | Placebo                       | Unpublished                     | 3 000   |
| SOCCER           | Women with recurrent platinum-sensitive epithelial ovarian cancer                                     | Surgery               | Secondary cytoreductive surgery + chemotherapy                  | Chemotherapy alone            | Unpublished                     | 0       |
| (Uro)gynaecology |                                                                                                       |                       |                                                                 |                               |                                 |         |
| CUPIDO-II        | Women with a prolapse and occult stress incontinence                                                  | Surgery               | Prolapse and concomitant anti-incontinence surgery              | Prolapse surgery              | Int Urogynecol J 2016           | 24 000  |

|          |                                                                                                                                                                          |                       |                                                                                                          |                                                              |                        |         |
|----------|--------------------------------------------------------------------------------------------------------------------------------------------------------------------------|-----------------------|----------------------------------------------------------------------------------------------------------|--------------------------------------------------------------|------------------------|---------|
| HYSNICHE | Women with postmenstrual spotting after a cesarean section and a niche with a residual myometrium of at least 3 mm during sonohysterography                              | Surgery               | Hysteroscopic resection of the niche                                                                     | Expectant management                                         | BJOG 2017              | 250 000 |
| PEOPLE   | Treatment naïve women with pelvic organ prolapse who present with moderate to severe symptoms                                                                            | Surgery               | Pessary therapy                                                                                          | Vaginal pelvic organ prolapse surgery                        | JAMA 2022              | 387 000 |
| POMPOEN  | Women with postmenopausal bleeding an endometrial thickness > 4 mm and benign result from endometrial sampling                                                           | Diagnostic            | Further diagnostic workup by hysteroscopy (preceded by saline infusion sonography)                       | Expectant management                                         | BJOG 2016              | 0       |
| PROSECCO | Women with a maximum of 3 symptomatic type 0 or 1 submucosal fibroids with maximum 3.5 cm diameter                                                                       | Surgery               | Hysteroscopic myomectomy procedural sedation and analgesia with propofol in outpatient setting           | General anaesthesia in operating theatre                     | Submitted              | 337 747 |
| SALTO    | Women with a history of hysterectomy presenting with symptomatic vaginal vault prolapse with or without concomitant cystocele and rectocele who chose to undergo surgery | Surgery               | Laparoscopic sacrocolpopexy                                                                              | Open abdominal sacrocolpopexy                                | Int Urogynaecol J 2017 | 350 000 |
| VUSIS-I  | Women with symptomatic stress urinary incontinence in whom conservative measures failed and in whom surgical treatment is considered                                     | Diagnostic strategies | Stress urinary incontinence therapy based on history clinical examination pad test and 48h voiding diary | Therapy based on the same parameters AND urodynamic findings | Neurourol Urodyn 2012  | 151 000 |

|                                            |                                                                                                                |                          |                              |                              |                                       |         |
|--------------------------------------------|----------------------------------------------------------------------------------------------------------------|--------------------------|------------------------------|------------------------------|---------------------------------------|---------|
| WOMAN                                      | Women with a symptomatic cyst or abscess of the Bartholin gland                                                | Gynaecological treatment | Treatment with Word catheter | Marsupialisation             | BJOG 2016                             | 0       |
| <b>Studies without recruitment failure</b> |                                                                                                                |                          |                              |                              |                                       |         |
| <i>Obstetrics</i>                          |                                                                                                                |                          |                              |                              |                                       |         |
| 2CLOSE                                     | Caesarean section                                                                                              | Surgery                  | Single layer uterine closure | Double layer uterine closure | BJOG 2021                             | 359 143 |
| ALLO                                       | Women in labour at term with clinical indices of foetal hypoxia prompting immediate delivery                   | Drugs                    | Allopurinol                  | Placebo                      | Arch Dis Child Fetal Neonatal Ed 2015 | 124 576 |
| AMPHIA                                     | Women with a multiple pregnancy                                                                                | Drugs                    | Progesterone injections      | Placebo                      | Obstetrics & Gynecology 2011          | 400 000 |
| APOSTEL-I                                  | Women with symptoms of preterm labour 24-34 weeks negative fibronectin test                                    | Drugs                    | Nifedipine                   | Placebo                      | Am J Perinatol 2015                   | 286 413 |
| APOSTEL-II                                 | Women with threatened preterm labour 26-32 weeks after tocolysis and corticosteroids 48 hours                  | Drugs                    | Nifedipine for 12 days       | Placebo                      | JAMA 2013                             | 316 168 |
| APOSTEL-III                                | Women with threatened preterm birth 25-34 weeks                                                                | Drugs                    | Nifidipine                   | Atosiban                     | Lancet 2016                           | 320 000 |
| APRIL                                      | Women with a singleton pregnancy and history of spontaneous preterm birth of singleton between 22 and 37 weeks | Drugs                    | Low dose aspirin             | Placebo                      | PLOS Med 2022                         | 351 898 |
| HYPITAT                                    | Women with a singleton pregnancy 36-41 weeks with gestational hypertension or mild pre-eclampsia               | Obstetrical treatments   | Induction of labour          | Expectant management         | Lancet 2009                           | 380 000 |

|                       |                                                                                                            |                        |                                                           |                                           |                              |         |
|-----------------------|------------------------------------------------------------------------------------------------------------|------------------------|-----------------------------------------------------------|-------------------------------------------|------------------------------|---------|
| MOTHER                | Women with hyperemesis gravidarum                                                                          | Obstetrical treatments | Enteral tube feeding                                      | Standard care                             | Am J Clin Nutr 2017          | 1 000   |
| PPROMEXIL             | Non-labouring women with > 24h preterm pre-labour rupture of membranes 34-37 weeks gestation               | Obstetrical treatments | Induction of labour                                       | Expectant management                      | PLos medicine 2012           | 600 000 |
| PPROMEXIL-2           | Non-labouring women with preterm pre-labour rupture of membranes                                           | Obstetrical treatments | Induction of labour                                       | Expectant management                      | Am J Obstet Gynecol 2012     | 600 000 |
| PROBAAT               | Women with an unfavourable cervix                                                                          | Obstetrical treatments | Foley catheter                                            | Vaginal prostaglandin E2 gel              | Lancet 2011                  | 0       |
| PROBAAT-II            | Women with a term singleton pregnancy and an unfavourable cervix                                           | Obstetrical treatments | Foley catheter                                            | Misoprostol                               | Lancet 2016                  | 80 000  |
| PROTWIN               | Women with a multiple pregnancy 12-20 weeks gestation                                                      | Obstetrical treatments | Cervical pessary                                          | Control group                             | Lancet 2013                  | 313 399 |
| RAVEL                 | Women with an intermediate to high obstetric risk with an intention to deliver vaginally                   | Obstetrical treatment  | Pain relief strategy with patient controlled remifentanyl | Epidural analgesia                        | BMJ 2015                     | 450 000 |
| STAN                  | Labouring women with a high-risk singleton pregnancy in cephalic presentation beyond 36 weeks of gestation | Obstetrical treatments | Monitoring by cardiotocography with ST analysis           | Cardiotocography only                     | Obstetrics & Gynecology 2010 | 400 000 |
| Reproductive medicine |                                                                                                            |                        |                                                           |                                           |                              |         |
| Antarctica2           | Timing frozen embryo transfers                                                                             | Fertility treatments   | Home-based monitoring of ovulation                        | Hospital-controlled monitoring            | Lancet 2023                  | 599 375 |
| BEDREST               | Women having intrauterine insemination                                                                     | Fertility treatments   | 15 minutes of immobilisation after insemination           | Immediate immobilisation                  | BMJ 2009                     | 0       |
| INES                  | Couples seeking fertility treatment unexplained                                                            | Fertility treatments   | Three cycles of in vitro fertilisation with               | Six cycles of in vitro fertilisation in a | BMJ 2015                     | 374 116 |



|           |                                                                                                                            |                      |                                                                                     |                                        |                         |         |
|-----------|----------------------------------------------------------------------------------------------------------------------------|----------------------|-------------------------------------------------------------------------------------|----------------------------------------|-------------------------|---------|
|           | or mild male subfertility                                                                                                  |                      | single embryo transfer                                                              | modified natural cycle**               |                         |         |
| INSIGHT   | Women with a normal transvaginal ultrasound of the uterine cavity who were scheduled for their first IVF treatment         | Surgery              | Hysteroscopy with treatment of detected intra-cavity abnormalities before start IVF | Immediate start of IVF                 | Lancet 2016             | 474 147 |
| LIFESTYLE | Infertile women with a BMI of 29 or higher who did not conceive naturally                                                  | Fertility treatments | 6 month lifestyle-intervention program preceding 18 months of infertility treatment | Prompt infertility treatment           | NEJM 2016               | 766 000 |
| OPTIMIST  | Women initiating IVF/ICSI                                                                                                  | Drugs                | Dose adjustment according to AFC                                                    | Standard dose                          | Human reproduction 2017 | 480 000 |
| SCRATCH   | Women with one previous failed IVF/ICSI treatment and planning a second fresh IVF/ICSI treatment                           | Surgery              | Endometrium scratching                                                              | Standard treatment                     | Human reproduction 2021 | 550 899 |
| SelecTimo | Couples undergoing in-vitro fertilisation or intracytoplasmic sperm injection                                              | Fertility treatments | Time-lapse routine or early embryo viability assessment                             | Standard treatment                     | Lancet 2023             | 650 000 |
| SUPER     | Couples diagnosed with unexplained subfertility and scheduled for a maximum of four cycles of IUI with ovarian stimulation | Drugs                | FSH                                                                                 | Clomiphene citrate                     | Human Reproduction 2018 | 314 310 |
| TOF       | Women under 43 years receiving a IVF/ICSI treatment                                                                        | Fertility treatments | Blastocyst stage (day 5) embryo transfer                                            | Cleavage stage (day 3) embryo transfer | Submitted               | 700 000 |
| Oncology  |                                                                                                                            |                      |                                                                                     |                                        |                         |         |
| TLH       | Women with stage I endometrioid adenocarcinoma or                                                                          | Surgery              | Total laparoscopic hysterectomy                                                     | Total abdominal hysterectomy           | Lancet 2010             | 400 000 |

|                  |                                                                                                                                                                |                           |                                                       |                                                                   |                           |         |
|------------------|----------------------------------------------------------------------------------------------------------------------------------------------------------------|---------------------------|-------------------------------------------------------|-------------------------------------------------------------------|---------------------------|---------|
| Vaccin           | complex atypical hyperplasia<br>Adult female patients diagnosed with (histologically proven) CIN II-III and treated with LEEP and no prior vaccination for HPV | Drugs                     | HPV vaccination                                       | Placebo                                                           | Awaiting follow-up        | Unknown |
| (Uro)gynaecology |                                                                                                                                                                |                           |                                                       |                                                                   |                           |         |
| CUPIDO-I         | Women with a prolapse and evident stress incontinence                                                                                                          | Surgery                   | Prolapse and concomitant anti-incontinence surgery    | Prolapse surgery                                                  | BJOG 2015                 | 0       |
| EVA              | Postmenopausal women undergoing primary pelvic organ prolapse surgery POP-Q stage > 2                                                                          | Drugs                     | Vaginal oestrogen cream                               | Placebo                                                           | Manuscript in preparation | 250 000 |
| MIRA1            | Women with heavy menstrual bleeding without intracavitary pathology                                                                                            | Gynaecological treatments | Levonorgestrel releasing intrauterine system (Mirena) | Bipolar radiofrequency endometrial ablation (Novasure)            | Am J Obstet Gynecol 2021  | 409 270 |
| MIRA2            | Women with heavy menstrual bleeding who opt for treatment with endometrial ablation                                                                            | Surgery                   | Endometrial ablation plus LNG-IUS                     | Endometrial ablation                                              | Manuscript in preparation | 473 852 |
| PORTRET          | Women with stress urinary incontinence                                                                                                                         | Surgery                   | Physiotherapy                                         | Midurethral-sling surgery                                         | NEJM 2013                 | 400 000 |
| SAM              | Women with symptomatic POP in any stage uterine descent and POP point D < minus 1 cm                                                                           | Surgery                   | Sacrospinous hysteropexy                              | Modified Manchester surgery                                       | JAMA 2023                 | 489 891 |
| SAVE U           | Women with uterine prolapse stage 2 or higher requiring surgery and no history of pelvic floor surgery                                                         | Surgery                   | Sacrospinous hysteropexy                              | Vaginal hysterectomy with suspension of the uterosacral ligaments | BMJ 2015                  | Unknown |

|          |                                                                                                                                      |                             |                  |                                                                                                 |                       |         |
|----------|--------------------------------------------------------------------------------------------------------------------------------------|-----------------------------|------------------|-------------------------------------------------------------------------------------------------|-----------------------|---------|
| VUSIS-II | Women with symptomatic stress urinary incontinence in whom conservative measures failed and in whom surgical treatment is considered | Surgery/diagnostic strategy | Surgical therapy | Any other therapy (surgical therapy or conservative treatments) as based on individual findings | Neurourol Urodyn 2012 | 151 000 |
|----------|--------------------------------------------------------------------------------------------------------------------------------------|-----------------------------|------------------|-------------------------------------------------------------------------------------------------|-----------------------|---------|

\*with or without nadroparin \*\*or six cycles of intrauterine insemination with ovarian hyper stimulation \*\*\*with intrauterine insemination or intercourse \*\*\*\*plus tamoxifen or letrozol
